# Supplementary material for: How can carbon labels and climate-friendly default options on restaurant menus contribute to the reduction of greenhouse gas emissions associated with dining?
Source: PLOS journal article supplement (doi:10.1371/journal.pclm.0000028), 2022-05-11
Supplement: S49 (10.1371/journal.pclm.0000028.s049) [file journal.pclm.0000028.s049]

## S10 Table. Pilot study values of side dishes for the Indian restaurant menu.

| Dish | Side dish | *n* | Selected side dishes |
| --- | --- | --- | --- |
| Tikka Masala | Beef | 16 | x |
|  | Chicken | 27 | x |
|  | Fried tofu | 14 |  |
|  | Grilled vegetables | 17 | x |
| Indian curry | Beef | 7 | x |
|  | Chicken | 50 | x |
|  | Fried tofu | 19 |  |
|  | Grilled vegetables | 19 | x |
| Mango sauce | Beef | 8 | x |
|  | Chicken | 41 | x |
|  | Fried tofu | 11 | x |
|  | Grilled vegetables | 11 |  |

*n* = number of participants who found the side dish appropriate. Selected side dishes = side dishes selected for the final menus.
